# Supplementary material for: Structural changes to forests during regeneration affect water flux partitioning, water ages and hydrological connectivity: Insights from tracer-aided ecohydrological modelling
Source: Copernicus journal article supplement (doi:10.5194/hess-25-4861-2021), 2021-09-07
Supplement: Supplementary file 1 [file hess-25-4861-2021-supplement.pdf]

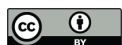

*Supplement of*

**Structural changes to forests during regeneration affect water flux partitioning, water ages and hydrological connectivity: Insights from tracer-aided ecohydrological modelling**

**Aaron J. Neill et al.**

*Correspondence to:* Aaron J. Neill ([aaron.neill@abdn.ac.uk](mailto:aaron.neill@abdn.ac.uk))

The copyright of individual parts of the supplement might differ from the article licence.

**Table S1: Forcing data used for EcH<sub>2</sub>O-iso**

| Forcing dataset(s)                                           | Source                                                                                    | Temporal coverage      | Notes                                                                                                                                                                             |
|--------------------------------------------------------------|-------------------------------------------------------------------------------------------|------------------------|-----------------------------------------------------------------------------------------------------------------------------------------------------------------------------------|
| Precipitation                                                | Interpolated using an inverse distance-weighted algorithm and five nearby (<10 km) gauges | Prior to July 2014     | c.f. Capell et al. (2012)                                                                                                                                                         |
|                                                              | Up to three automated weather stations in the catchment                                   | July 2014 onwards      | -                                                                                                                                                                                 |
| Minimum and maximum air temperature                          | ERA-interim climate reanalysis                                                            | Prior to July 2014     | See Dee et al. (2011)                                                                                                                                                             |
|                                                              | Up to three automated weather stations in the catchment                                   | July 2014 onwards      | -                                                                                                                                                                                 |
| Mean air temperature, relative humidity and windspeed        | Balmoral weather station ~5 km away                                                       | Prior to July 2014     | See Met Office (2017)                                                                                                                                                             |
|                                                              | Up to three automated weather stations in the catchment                                   | July 2014 onwards      | -                                                                                                                                                                                 |
| Short- and long-wave radiation                               | ERA-interim climate reanalysis                                                            | Full simulation period | See Dee et al. (2011)                                                                                                                                                             |
| Isotopic ( $\delta^2\text{H}$ ) composition of precipitation | ISCO 3700 sampler at catchment outlet                                                     | Full simulation period | Daily bulk samples were collected and preserved under a layer of paraffin. A Los Gatos DLT-100 was used for isotope analysis ( $\delta^2\text{H}$ precision: $\pm 0.4\text{‰}$ ). |

**Table S2: The sampling ranges and 90%-spread calibrated ranges of soil, vegetation and channel parameters identified as sensitive in this application of EcH2O-iso. Additional information on parameter definitions can be found at: <https://ech2o-iso.readthedocs.io/en/latest/Setup.html>**

| Parameter                                                       | Sampling range [90% spread calibrated range]                                                |                                                                                             |                                                                                             |                                                                                             |
|-----------------------------------------------------------------|---------------------------------------------------------------------------------------------|---------------------------------------------------------------------------------------------|---------------------------------------------------------------------------------------------|---------------------------------------------------------------------------------------------|
| <i>Soil</i>                                                     | <i>Peat</i>                                                                                 | <i>Peaty gley</i>                                                                           | <i>Podzol</i>                                                                               | <i>Ranker</i>                                                                               |
| Air entry pressure (m)                                          | 0.01-0.45<br>[0.05-0.41]                                                                    | 0.01-0.1<br>[0.03-0.09]                                                                     | 0.01-0.1<br>[0.02-0.09]                                                                     | 0.05-0.2<br>[0.06-0.17]                                                                     |
| Brooks-Corey lambda (-)                                         | 3.0-8.0<br>[3.1-7.8]                                                                        | 3.0-8.0<br>[4.9-7.8]                                                                        | 3.0-8.0<br>[4.1-7.0]                                                                        | 3.0-8.0<br>[3.4-7.4]                                                                        |
| Soil L1 depth (m)                                               | 0.05-0.15<br>[0.05-0.13]                                                                    | 0.05-0.15<br>[0.05-0.14]                                                                    | 0.05-0.15<br>[0.06-0.13]                                                                    | 0.05-0.15<br>[0.06-0.14]                                                                    |
| Soil L2 depth (m)                                               | 0.05-0.20<br>[0.05-0.19]                                                                    | 0.05-0.20<br>[0.07-0.18]                                                                    | 0.05-0.20<br>[0.06-0.20]                                                                    | 0.05-0.20<br>[0.06-0.19]                                                                    |
| Total soil depth (m)                                            | 0.5-40.0<br>[0.7-36.4]                                                                      | 0.5-40.0<br>[1.1-27.2]                                                                      | 0.5-10.0<br>[1.7-8.3]                                                                       | 0.5-5.0<br>[0.7-4.6]                                                                        |
| Saturated horizontal hydraulic conductivity (ms <sup>-1</sup> ) | 1.0×10 <sup>-5</sup> -1×10 <sup>-2</sup><br>[1.6×10 <sup>-5</sup> -3.6×10 <sup>-3</sup> ]   | 1.0×10 <sup>-5</sup> -1.0×10 <sup>-3</sup><br>[2.2×10 <sup>-5</sup> -8.5×10 <sup>-4</sup> ] | 1.0×10 <sup>-5</sup> -1.0×10 <sup>-3</sup><br>[4.6×10 <sup>-4</sup> -9.1×10 <sup>-4</sup> ] | 1.0×10 <sup>-6</sup> -1.0×10 <sup>-4</sup><br>[1.2×10 <sup>-6</sup> -8.2×10 <sup>-5</sup> ] |
| Anisotropy (-)                                                  | 1.0×10 <sup>-3</sup> -1.0<br>[1.6×10 <sup>-3</sup> -0.85]                                   | 1.0×10 <sup>-3</sup> -0.6<br>[1.8×10 <sup>-3</sup> -0.35]                                   | 1.0×10 <sup>-3</sup> -0.6<br>[1.3×10 <sup>-3</sup> -0.53]                                   | 1.0×10 <sup>-3</sup> -0.6<br>[1.1×10 <sup>-3</sup> -0.22]                                   |
| Conductivity exponential decay constant (m <sup>-1</sup> )      | 1.0-5.0<br>[1.2-4.8]                                                                        | 1.0-5.0<br>[1.9-4.6]                                                                        | 1.0-5.0<br>[1.5-4.9]                                                                        | 1.0-5.0<br>[1.3-4.7]                                                                        |
| Porosity (m <sup>3</sup> m <sup>-3</sup> )                      | 0.8-0.98<br>[0.81-0.93]                                                                     | 0.7-0.9<br>[0.74-0.89]                                                                      | 0.4-0.7<br>[0.50-0.69]                                                                      | 0.4-0.6<br>[0.42-0.57]                                                                      |
| Porosity exponential decay constant (m <sup>-1</sup> )          | 5.0-10.0<br>[5.4-9.7]                                                                       | 5.0-10.0<br>[5.5-9.3]                                                                       | 3.0-5.0<br>[3.2-4.9]                                                                        | 0.5-1.0<br>[0.6-1.0]                                                                        |
| <i>Vegetation</i>                                               | <i>Pre-existing pine</i>                                                                    | <i>Heather</i>                                                                              | <i>Sphagnum</i>                                                                             | <i>Molinia grass</i>                                                                        |
| LAI (m <sup>2</sup> m <sup>-2</sup> )                           | 2.0-4.0<br>[2.2-3.8]                                                                        | 1.4-2.0<br>[1.5-2.0]                                                                        | 2.0-3.5<br>[2.1-3.4]                                                                        | 1.0-3.0<br>[1.2-2.8]                                                                        |
| Maximum canopy water storage (m LAI <sup>-1</sup> )             | 3.0×10 <sup>-4</sup> -3.0×10 <sup>-3</sup><br>[3.5×10 <sup>-4</sup> -2.7×10 <sup>-3</sup> ] | 5.0×10 <sup>-4</sup> -2.0×10 <sup>-3</sup><br>[5.4×10 <sup>-4</sup> -1.7×10 <sup>-3</sup> ] | 1.0×10 <sup>-3</sup> -1.0×10 <sup>-2</sup><br>[1.2×10 <sup>-3</sup> -7.9×10 <sup>-3</sup> ] | 1.0×10 <sup>-4</sup> -5.0×10 <sup>-4</sup><br>[1.4×10 <sup>-4</sup> -4.7×10 <sup>-4</sup> ] |
| Maximum stomatal conductance (ms <sup>-1</sup> )                | 3.3×10 <sup>-3</sup> -8.1×10 <sup>-3</sup><br>[3.6×10 <sup>-3</sup> -7.9×10 <sup>-3</sup> ] | 5.2×10 <sup>-3</sup> -6.6×10 <sup>-3</sup><br>[5.3×10 <sup>-3</sup> -6.5×10 <sup>-3</sup> ] | 1.3×10 <sup>-2</sup> -1.8×10 <sup>-2</sup><br>[1.3×10 <sup>-2</sup> -1.8×10 <sup>-2</sup> ] | 6.4×10 <sup>-3</sup> -1.5×10 <sup>-2</sup><br>[6.6×10 <sup>-3</sup> -1.4×10 <sup>-2</sup> ] |
| Stomatal sensitivity to light (-)                               | 200-500<br>[213-452]                                                                        | 200-500<br>[223-442]                                                                        | 200-500<br>[220-496]                                                                        | 200-500<br>[222-479]                                                                        |
| Stomatal sensitivity to vapour pressure deficit (-)             | 1.0×10 <sup>-3</sup> -3.0×10 <sup>-3</sup><br>[1.9×10 <sup>-3</sup> -2.9×10 <sup>-3</sup> ] | 1.0×10 <sup>-3</sup> -3.0×10 <sup>-3</sup><br>[1.1×10 <sup>-3</sup> -2.9×10 <sup>-3</sup> ] | 1.0×10 <sup>-3</sup> -3.0×10 <sup>-3</sup><br>[1.1×10 <sup>-3</sup> -2.9×10 <sup>-3</sup> ] | 1.0×10 <sup>-3</sup> -3.0×10 <sup>-3</sup><br>[1.1×10 <sup>-3</sup> -2.8×10 <sup>-3</sup> ] |
| Soil water potential (-MPa):                                    |                                                                                             |                                                                                             |                                                                                             |                                                                                             |
| • Causing complete stomatal closure                             | 1.5-6.0<br>[1.8-5.8]                                                                        | 1.5-6.0<br>[1.8-5.7]                                                                        | 1.5-6.0<br>[1.8-5.6]                                                                        | 1.5-6.0<br>[1.6-5.8]                                                                        |
| • No longer limiting stomatal conductance                       | 0.1-1.0                                                                                     | 0.1-1.0                                                                                     | 0.1-1.0                                                                                     | 0.1-1.0                                                                                     |

|                                                                             |             |             |             |             |
|-----------------------------------------------------------------------------|-------------|-------------|-------------|-------------|
|                                                                             | [0.14-0.95] | [0.20-0.96] | [0.22-0.89] | [0.14-0.92] |
| Minimum temperature of comfort (°C)                                         | -5.0--3.0   | -5.0--3.0   | -5.0--3.0   | -6.0--3.0   |
|                                                                             | [-5.0--3.1] | [-4.8--3.2] | [-4.8--3.3] | [-5.8--3.1] |
| Optimal temperature (°C)                                                    | 10.0-25.0   | 15.0-25.0   | 10.0-18.0   | 12.0-18.0   |
|                                                                             | [11.0-24.2] | [15.3-24.4] | [10.3-17.3] | [12.2-17.2] |
| Maximum temperature of comfort (°C)                                         | 35.0-42.0   | 40.0-45.0   | 38.0-42.0   | 30.0-40.0   |
|                                                                             | [35.4-41.4] | [40.5-44.8] | [38.1-41.7] | [31.7-39.1] |
| Light attenuation coefficient (-)                                           | 0.3-0.6     | 0.3-0.6     | 0.3-0.6     | 0.3-0.6     |
|                                                                             | [0.33-0.58] | [0.36-0.58] | [0.39-0.60] | [0.33-0.58] |
| Vertical root distribution exponential<br>decay constant (m <sup>-1</sup> ) | 10.0-20.0   | 27.0-40.0   | 27.0-100.0  | 6.0-10.0    |
|                                                                             | [10.9-19.5] | [28.1-39.2] | [32.5-82.8] | [6.6-10.0]  |
| <i>Channel</i>                                                              |             |             |             |             |
| Channel resistance to groundwater<br>seepage (-)                            | 0.01-0.05   |             |             |             |
|                                                                             | [0.01-0.04] |             |             |             |
| Manning's n                                                                 | 1.0-50.0    |             |             |             |
|                                                                             | [4.8-49.1]  |             |             |             |

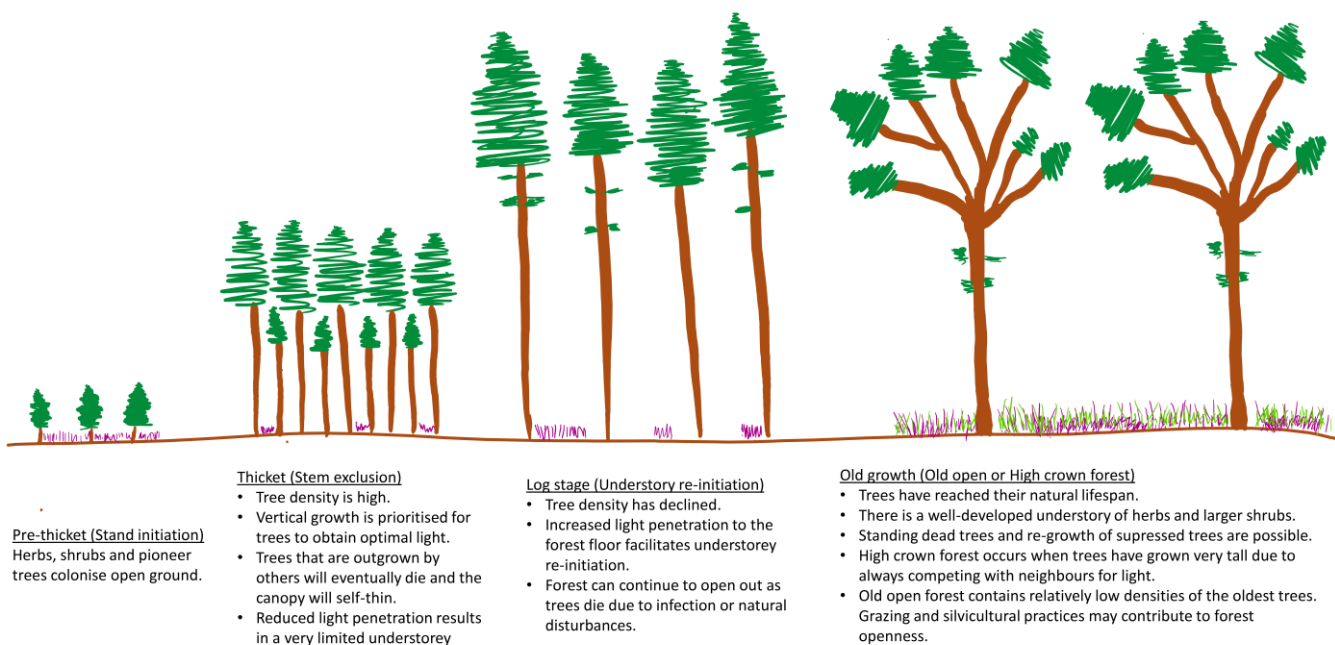

Figure S1: Summary of natural pinewood regeneration. After Summers (2018) and Summers et al. (2008).

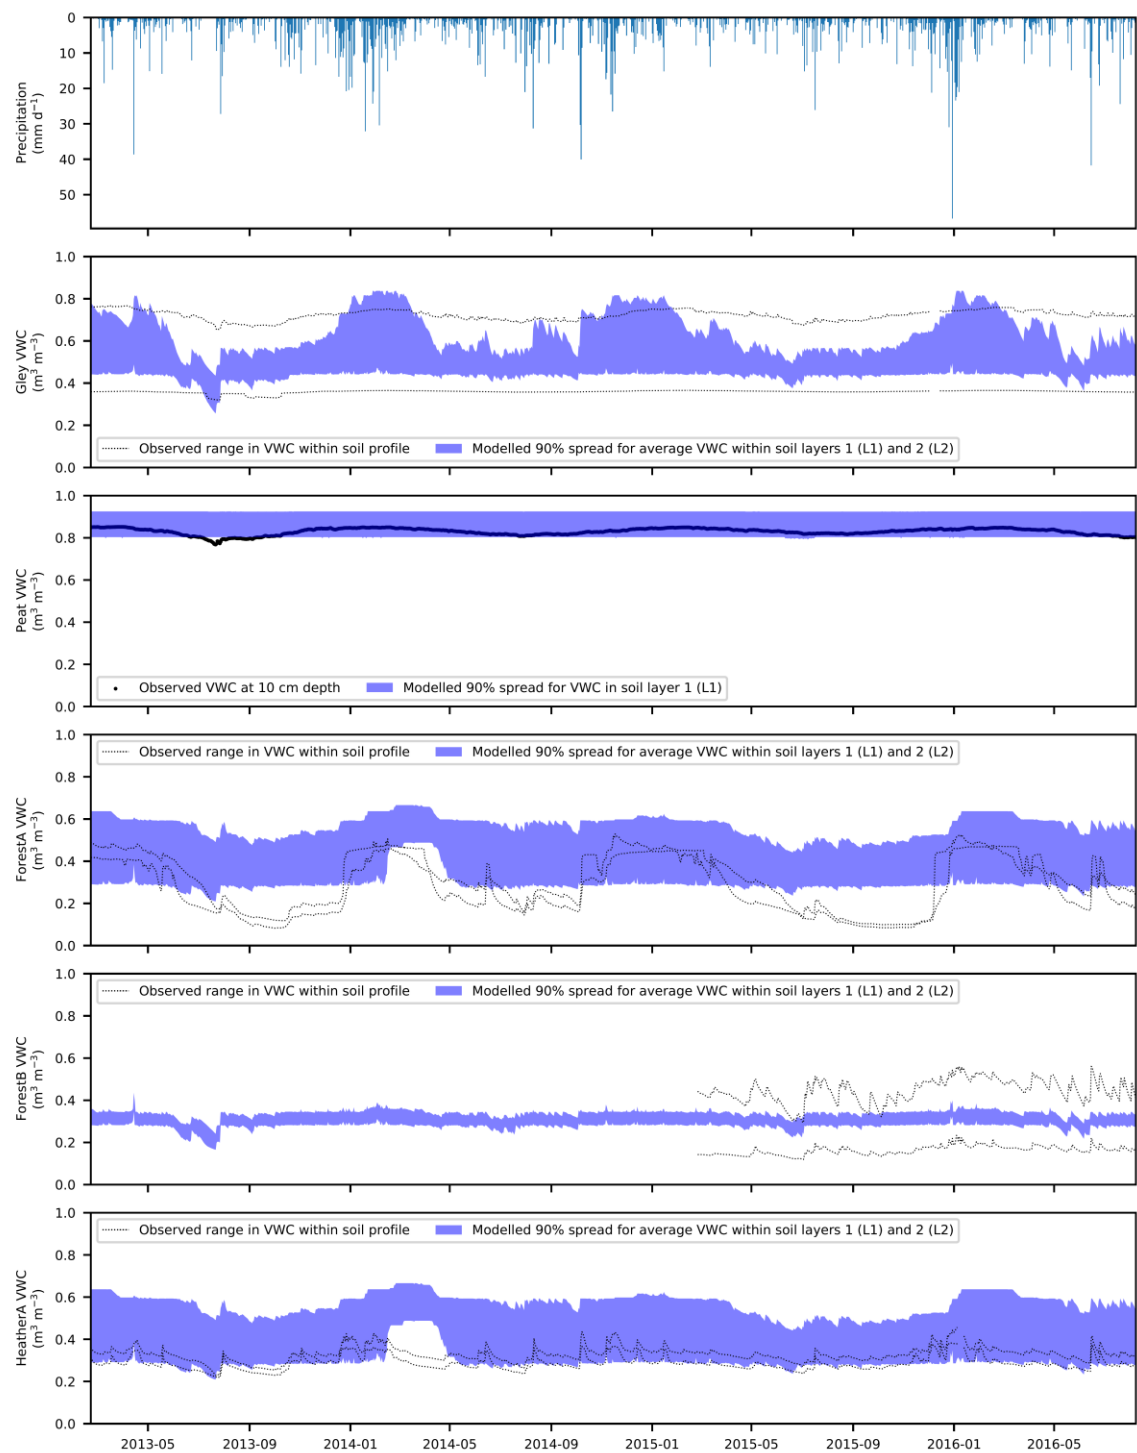

**Figure S2: Time series of observed and simulated volumetric water content (VWC) at sites not shown in Figure 3. 90% spread of simulations are from the 30 behavioural model runs.**

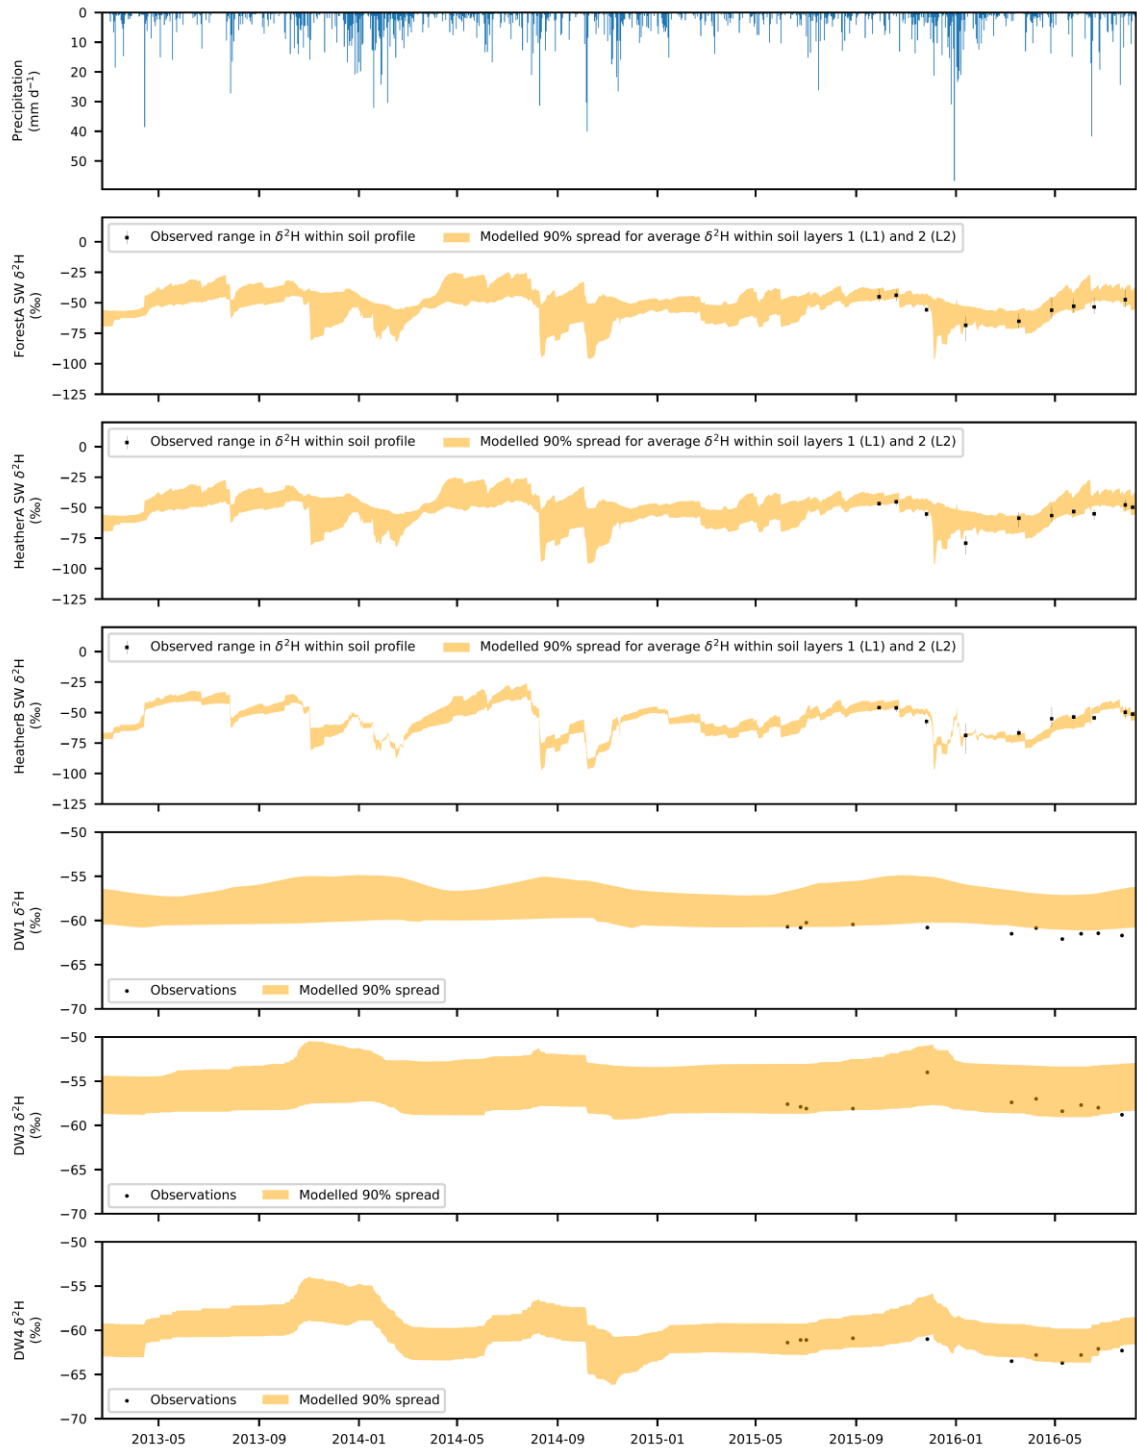

**Figure S3: Time series of observed and simulated soil water (SW) and deeper groundwater (DW) isotopes at sites not shown in Figure 3. 90% spread of simulations are from the 30 behavioural model runs.**

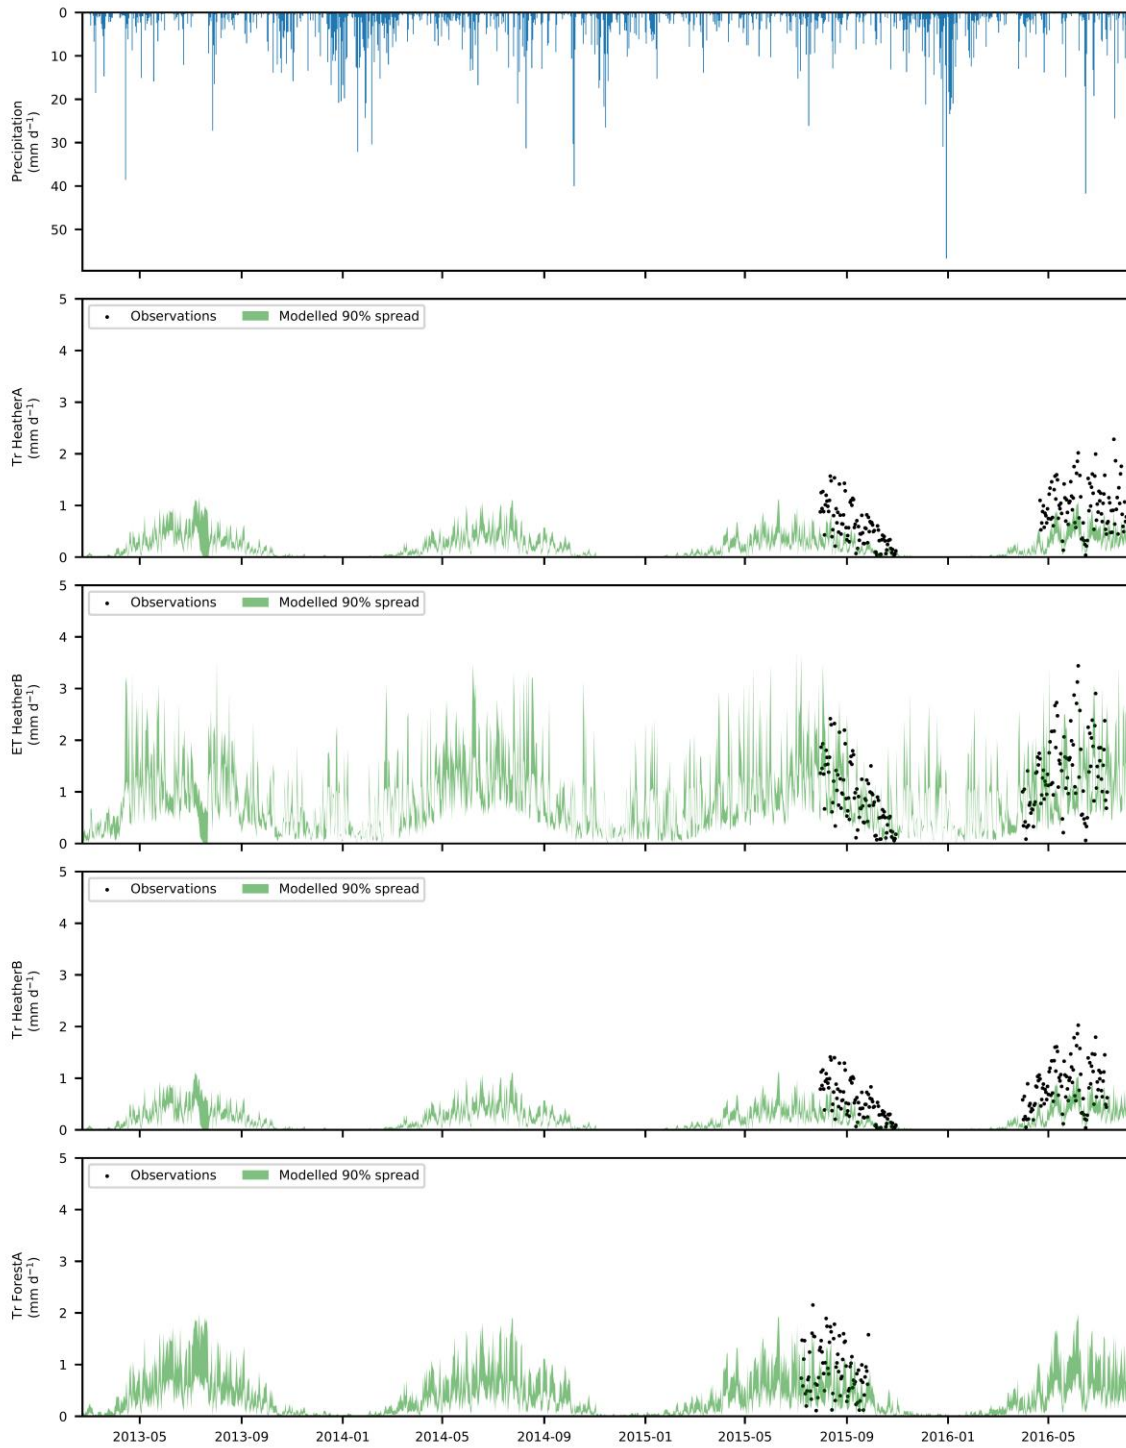

25 **Figure S4: Time series of observed and simulated evapotranspiration (ET) and transpiration (Tr) at sites not shown in Figure 3. 90% spread of simulations are from the 30 behavioural model runs.**



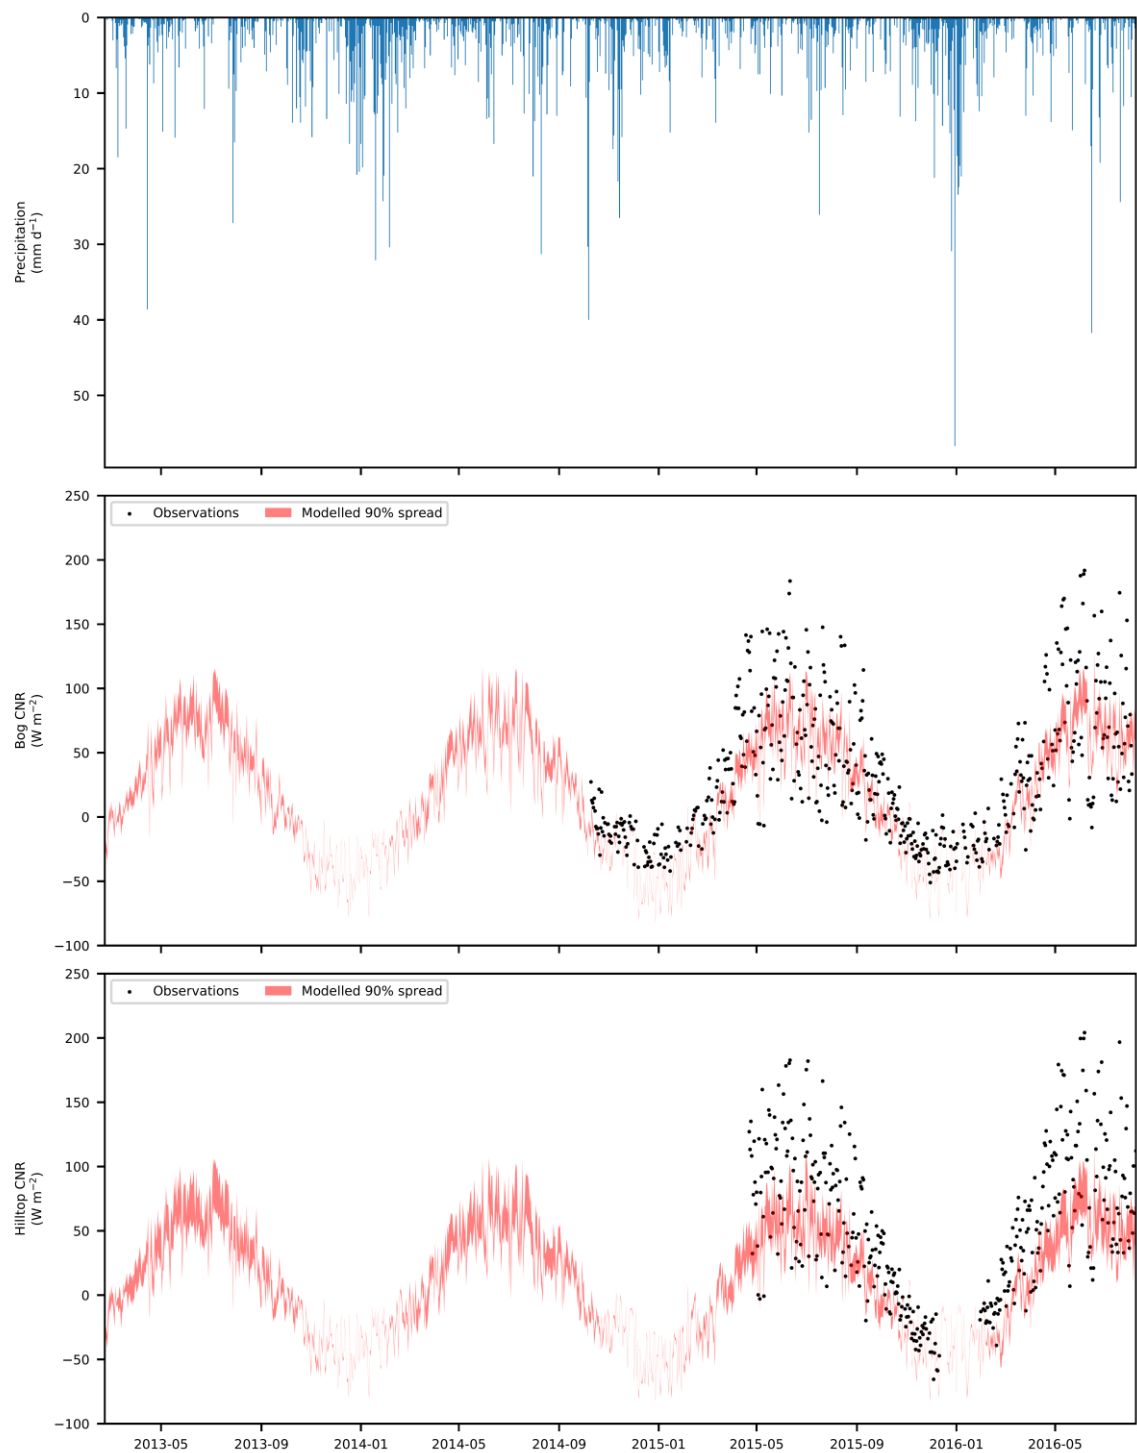

**Figure S5: Time series of observed and simulated net radiation (CNR) at sites not shown in Figure 3. 90% spread of simulations are from the 30 behavioural model runs.**

## 30 References

- Capell, R., Tetzlaff, D., Soulsby, C., 2012. Can time domain and source area tracers reduce uncertainty in rainfall-runoff models in larger heterogeneous catchments? *Water Resource Research* 48, W09544. DOI: 10.1029/2011WR011543
- Dee, D.P., Uppala, S.M., Simmons, A.J., Berrisford, P., Poli, P., Kobayashi, S., Andrae, U., Balmaseda, M.A., Balsamo, G., Bauer, P., Bechtold, P., Beljaars, A.C.M., van de Berg, L., Bidlot, J., Bormann, N., Delsol, C., Dragani, R., Fuentes, M., Geer, A.J., Haimberger, L., Healy, S.B., Hersbach, H., Holm, E.V., Isaksen, L., Kållberg, P., Kohler, M., Matricardi, M., McNally, A.P., Monge-Sanz, B.M., Morcrette, J.-J., Park, B.-K., Peubey, C., de Rosnay, P., Tavalato, C., Thepaut, J.-N., Vitart, F., 2011. The ERA-Interim reanalysis: configuration and performance of the data assimilation system. *Quarterly Journal of the Royal Meteorological Society* 137: 553-597. DOI: 10.1002/qj.828
- Met Office, 2017. Met Office Integrated Data Archive System (MIDAS) Land and Marine Surface Stations Data (1853-current). NCAS Br. Atmospheric Data Cent.
- Summers, R.W., 2018. Abernethy Forest: The History and Ecology of an Old Scottish Pinewood. RSPB: Inverness.
- Summers, R.W., Wilkinson, N.I., Wilson, E.R., 2008. Age structure and history of stand types of *Pinus sylvestris* in Abernethy Forest, Scotland. *Scandinavian Journal of Forest Research* 23: 28-37. DOI: 10.1080/02827580701646513
